# Supplementary material for: US Physicians’ Self-reported Discussions About Tobacco-Free Nicotine Pouches During Clinical Encounters With Patients in 2021
Source: PubMed Central journal article supplement (PMC10189559; doi:10.1001/jamanetworkopen.2023.13583), 2023-05-16
Supplement: jamanetwopen-e2313583-s001.pdf [file jamanetwopen-e2313583-s001.pdf]

## Data Sharing Statement

Hrywna. US Physicians' Self-reported Discussions About Tobacco-Free Nicotine Pouches During Clinical Encounters With Patients in 2021. *JAMA Netw Open*. Published May 16, 2023. doi:10.1001/jamanetworkopen.2023.13583

### Data

**Data available:** No
